# Supplementary material for: Individual differences in metabolomics: individualised responses and between-metabolite relationships
Source: PubMed Central journal article supplement (PMC3337417; doi:10.1007/s11306-012-0414-8), 2012-03-15
Supplement: 11306_2012_414_MOESM1_ESM.pdf [file 11306_2012_414_MOESM1_ESM.pdf]

**Supplementary Table 1 Numbers of replicates in every experimental group  
(combination between time after harvest and jasmonic acid treatment)**

|        | Control | <i>RJA</i> | <i>SJA</i> |
|--------|---------|------------|------------|
| Day 1  | 10      | 9          | 10         |
| Day 7  | 10      | 7          | 9          |
| Day 14 | 10      | 6          | 9          |

## Individual differences in PRO and GBN 14 days after *SJA*

The group-level scores in Figure 5 also show a large increase in individual differences between 7 and 14 days after for the PRO and GBN levels. Projection of these results on the glucosinolate levels (analogous to the rightmost panels of Figure 1 and Figure 5) in Supplementary Figure 1 shows that several *SJA* plants still respond this late after the treatment, which clearly illustrates the chemical and dynamic richness of the induced plant response to herbivory.

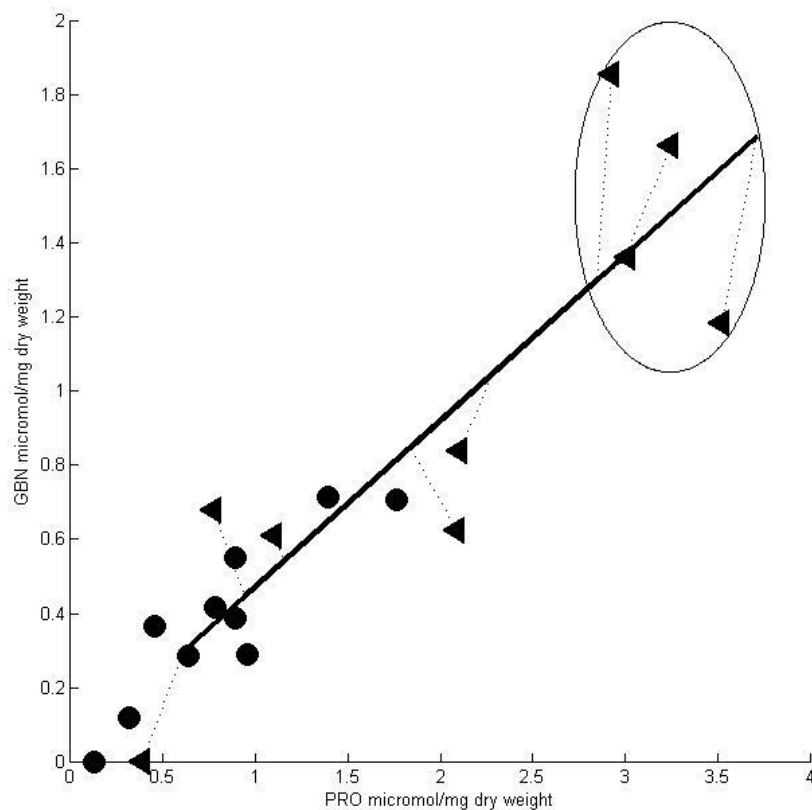

**Supplementary Figure 1 Glucosinolate levels for PRO and GBN, 14 days after *SJA* (triangles) and the corresponding control plants (circles). Four out of these 9 *SJA* plants have much larger levels of these glucosinolates than control plants.**
